# Supplementary material for: Electrochemical properties of all-solid-state lithium batteries with amorphous MoS3 electrodes prepared by mechanical milling
Source: Royal Society of Chemistry journal article supplement (doi:10.1039/c5ta02263k), 2015-01-01
Supplement: c5ta02263k1.pdf [file c5ta02263k1.pdf]

## Supplementary Material

### **Electrochemical properties of all-solid-state lithium batteries with amorphous MoS<sub>3</sub> electrodes prepared by mechanical milling**

**Takuya Matsuyama<sup>1</sup>, Akitoshi Hayashi<sup>1</sup>, Tomoatsu Ozaki<sup>2</sup>, Shigeo Mori<sup>2</sup> and**

**Masahiro Tatsumisago<sup>1</sup>**

<sup>1</sup> **Department of Applied Chemistry, Graduate School of Engineering,**

**Osaka Prefecture University, 1-1 Gakuen-cho, Naka-ku, Sakai, Osaka 599-8531, Japan**

<sup>2</sup> **Department of Materials Science, Graduate School of Engineering,**

**Osaka Prefecture University, 1-1 Gakuen-cho, Naka-ku, Sakai, Osaka 599-8531, Japan**

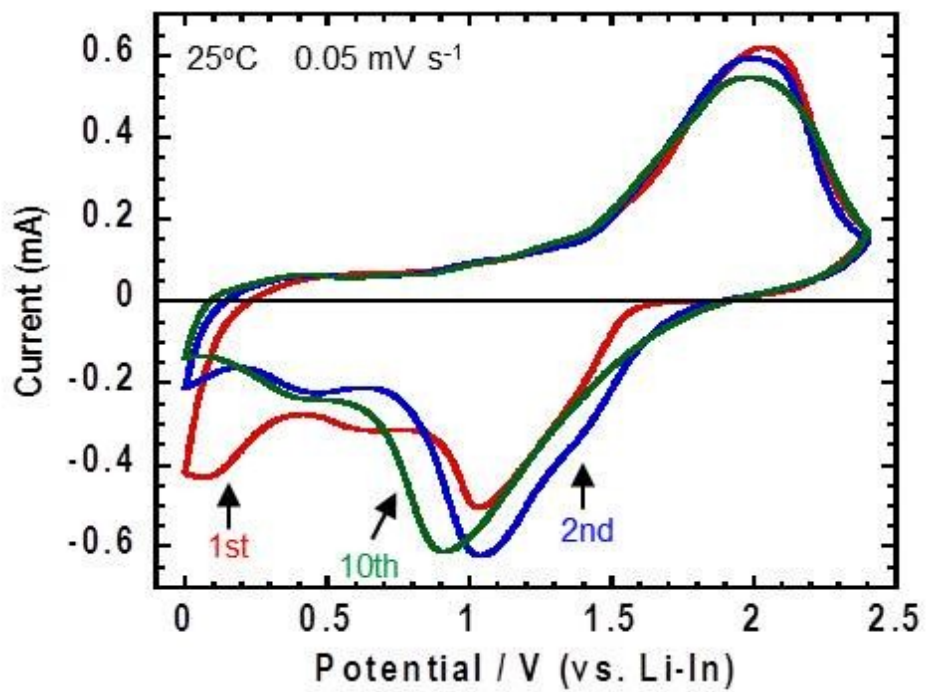

Fig. S1 Cyclic voltammogram of the all-solid-state cell with  $\alpha$ -MoS<sub>3</sub> electrode.
